# Supplementary material for: Compression of morbidity in a progeroid mouse model through the attenuation of myostatin/activin signalling
Source: PubMed Central journal article supplement (PMC6596402; doi:10.1002/jcsm.12404), 2019-03-27
Supplement: JCSM-10-662-s001.pdf [file JCSM-10-662-s001.pdf]

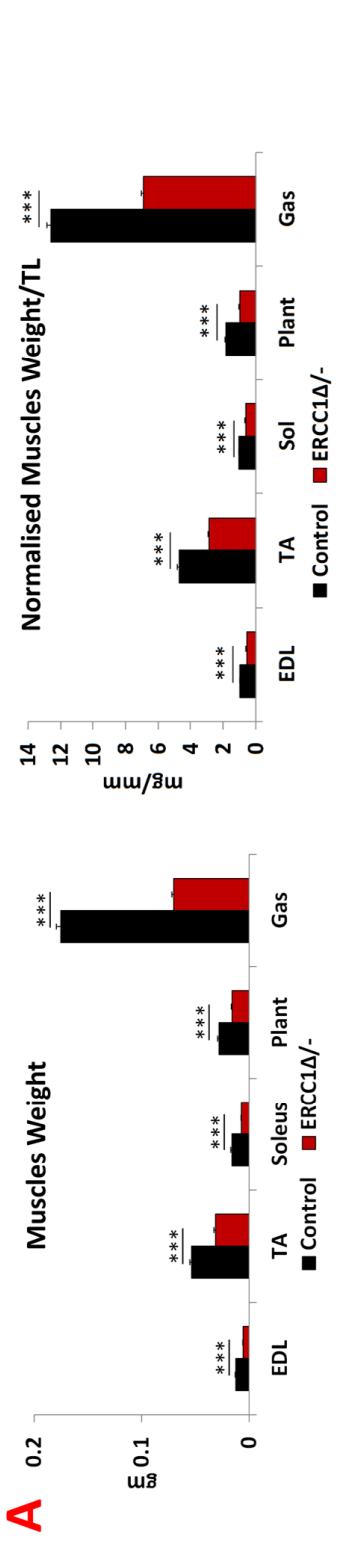

**C** Centrally Located Nuclei

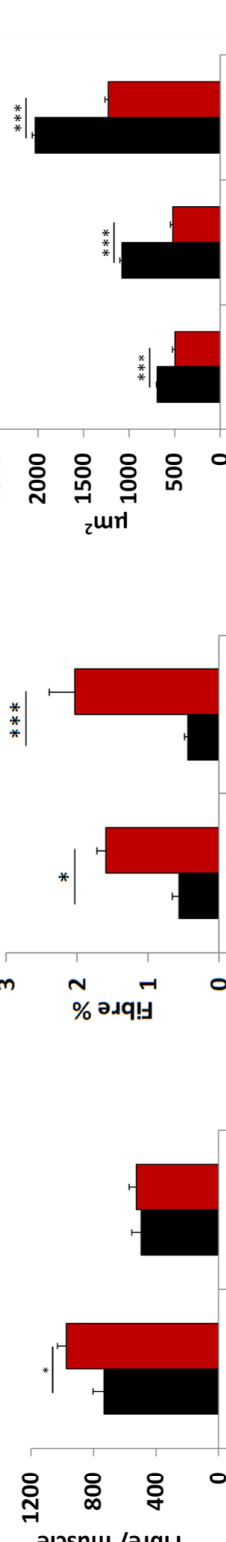

**D** EDL CSA

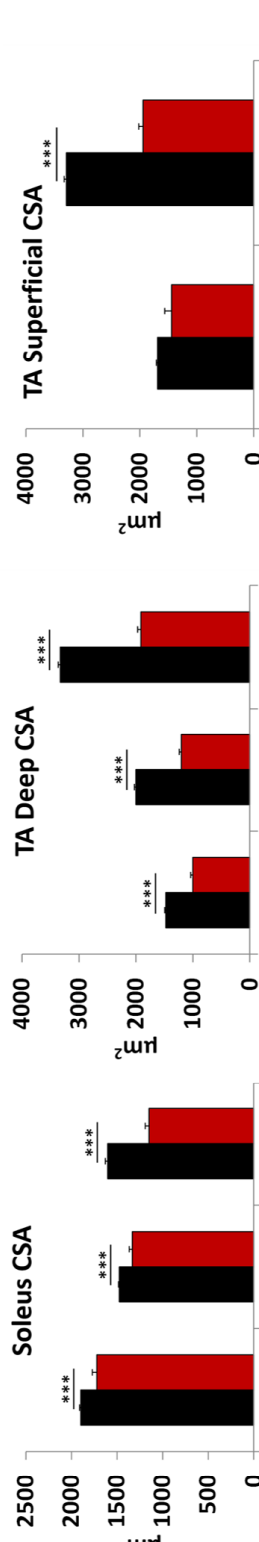

**E** Fibres Number

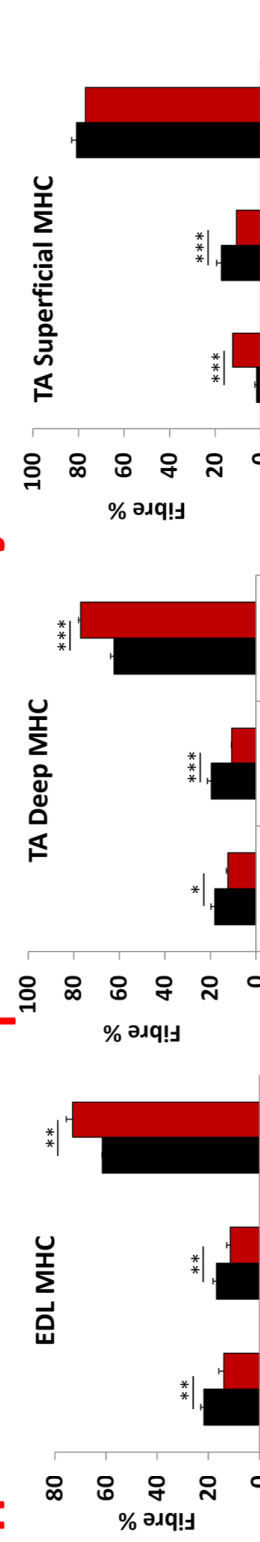

**F** Soleus CSA

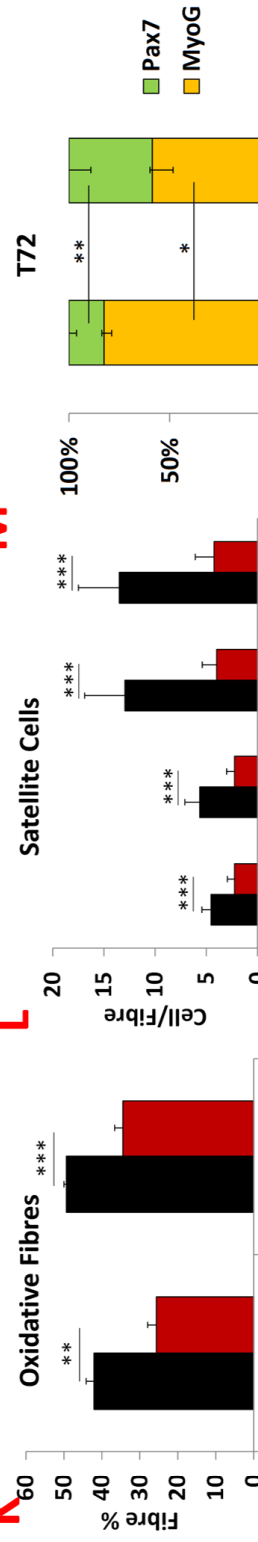

**G** TA Deep CSA

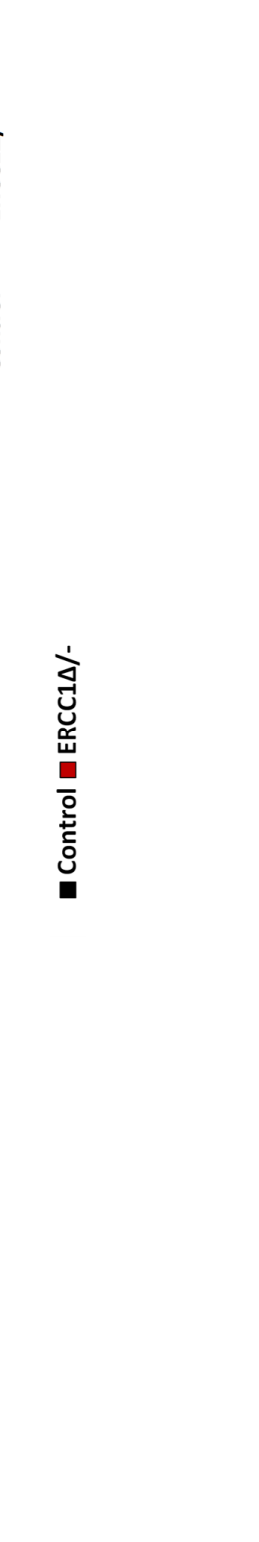

**H** TA Superficial CSA

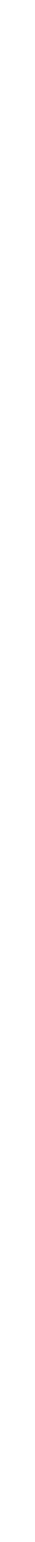

**I** TA Deep MHC



**J** TA Superficial MHC



**K** Oxidative Fibres



**L** Satellite Cells



**M** Pax7



**N** MyoG
