# Supplementary material for: Compression of morbidity in a progeroid mouse model through the attenuation of myostatin/activin signalling
Source: PubMed Central journal article supplement (PMC6596402; doi:10.1002/jcsm.12404), 2019-03-27

**A** Change in Body weight Week 8 to 16

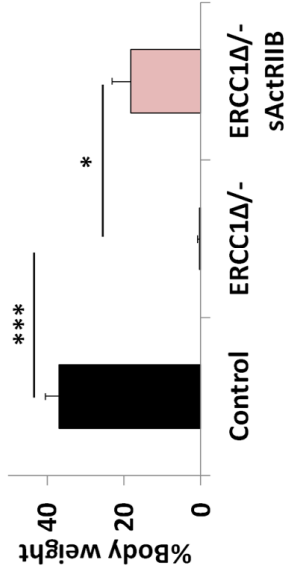

**B** Body weight/Tibia length

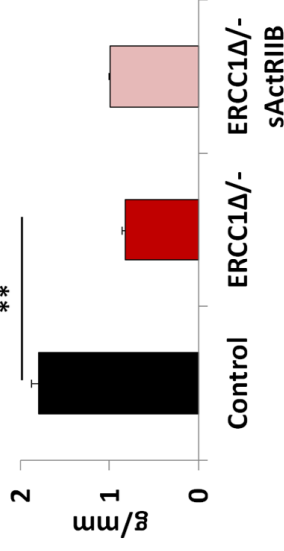

Organ weight

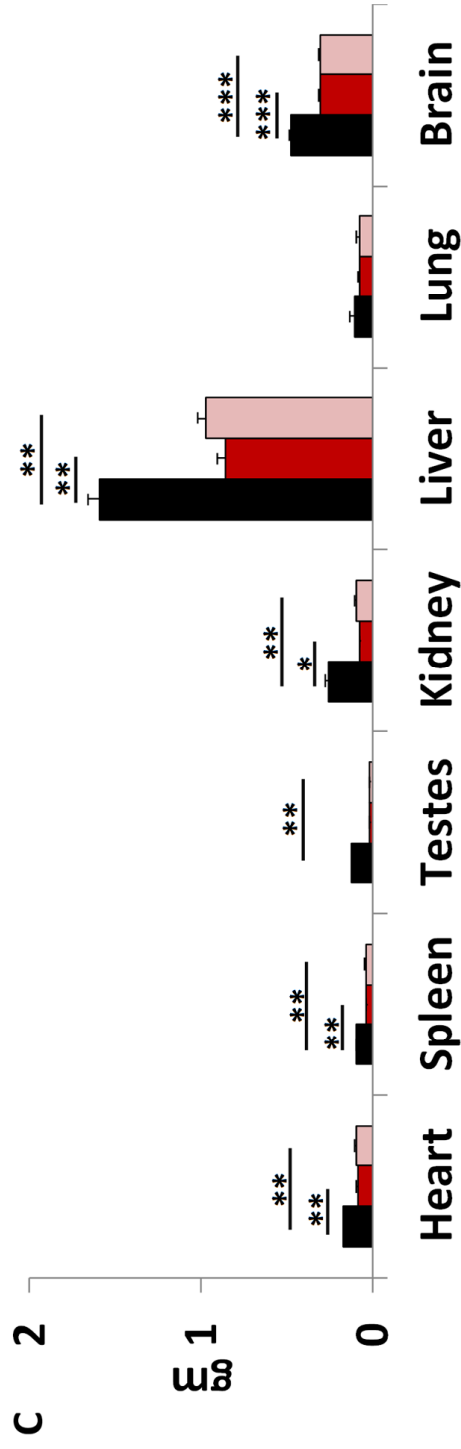

**D** Organ weight/ Tibia Length

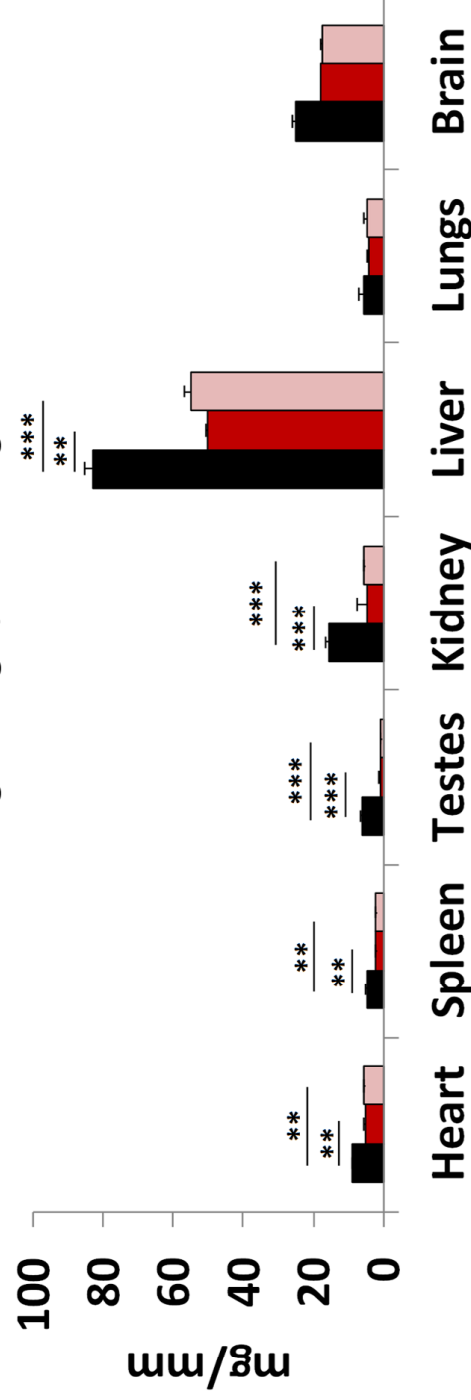

Supplement: JCSM-10-662-s002.pdf [file JCSM-10-662-s002.pdf]
