# Supplementary material for: Compression of morbidity in a progeroid mouse model through the attenuation of myostatin/activin signalling
Source: PubMed Central journal article supplement (PMC6596402; doi:10.1002/jcsm.12404), 2019-03-27

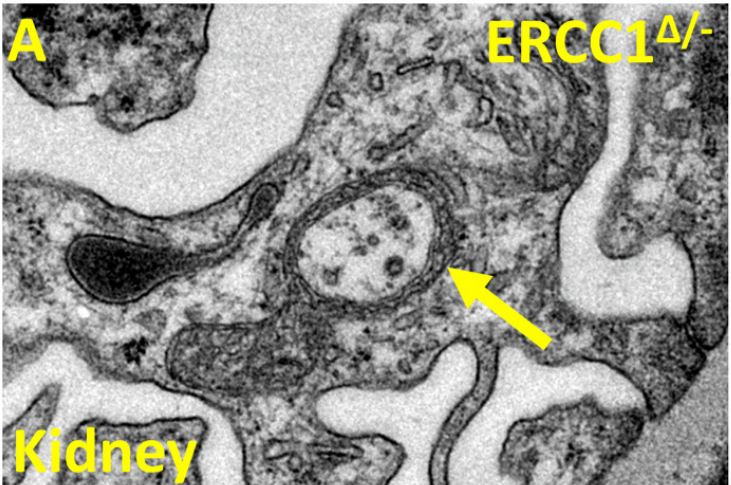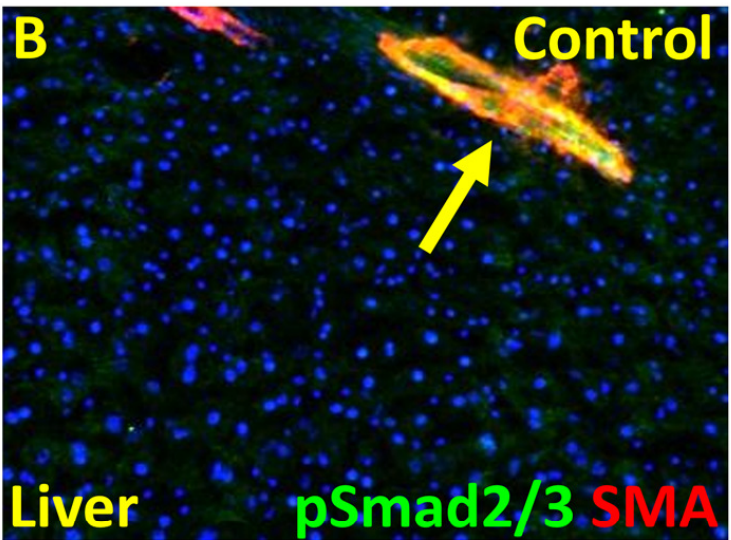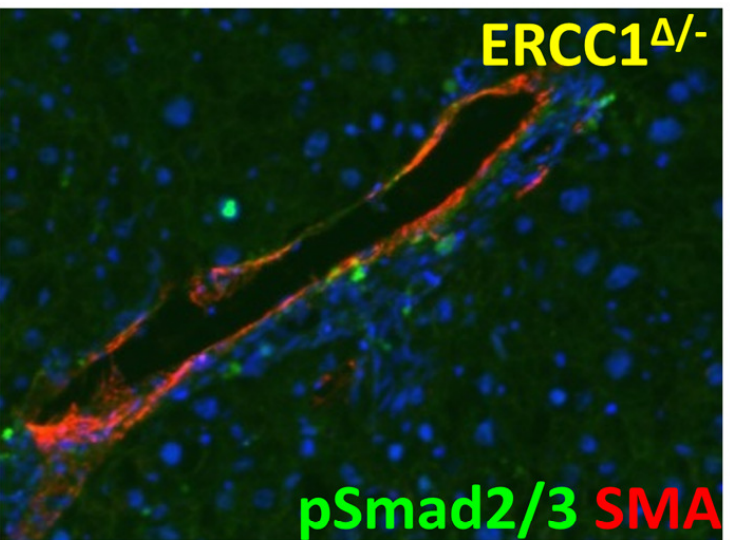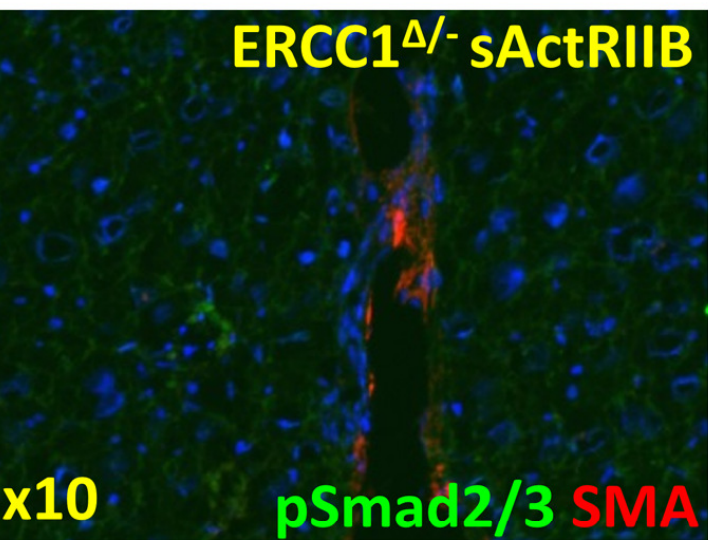

Supplement: JCSM-10-662-s005.pdf [file JCSM-10-662-s005.pdf]
