# Supplementary material for: Compression of morbidity in a progeroid mouse model through the attenuation of myostatin/activin signalling
Source: PubMed Central journal article supplement (PMC6596402; doi:10.1002/jcsm.12404), 2019-03-27

ERCC1 $\Delta$ / $\Delta$ -  
sActRIIB

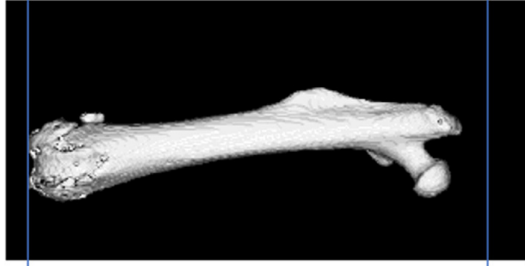

ERCC1 $\Delta$ / $\Delta$ -  
sActRIIB

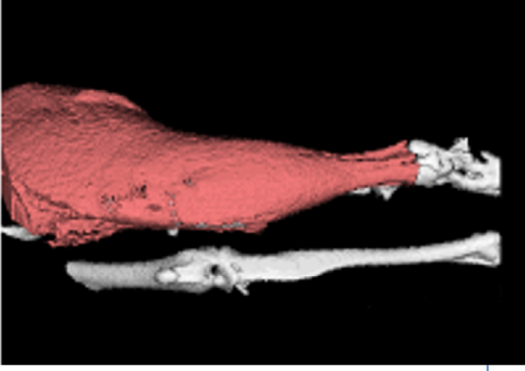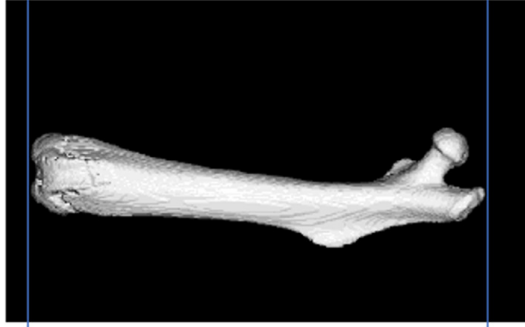

A

### B Body weight males

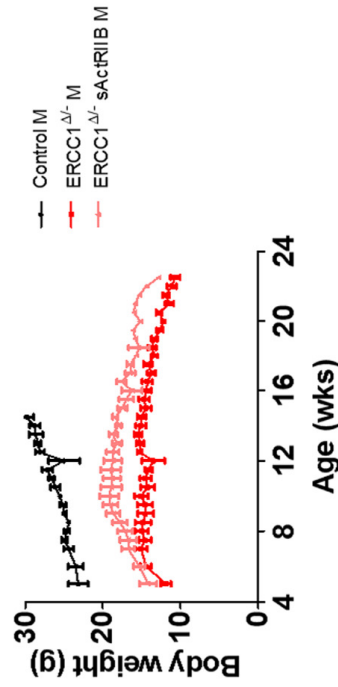

### Body weight females

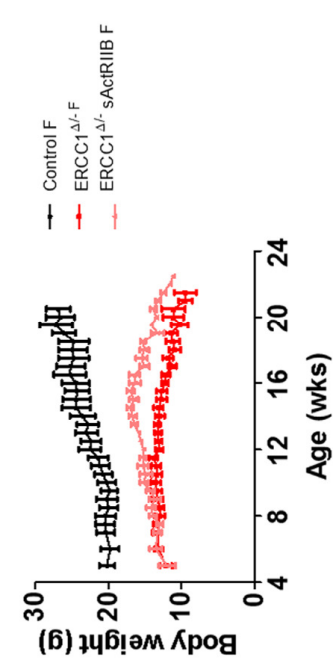

### C Severe tremors males

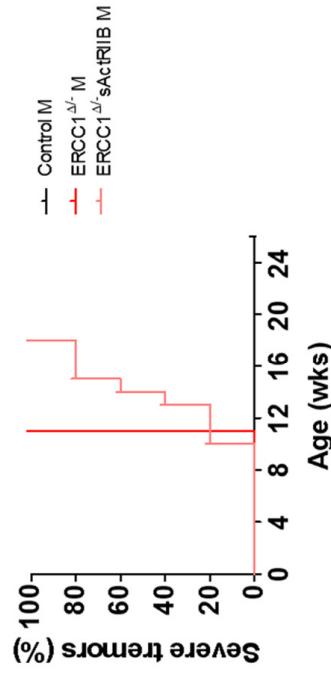

### Severe tremors females

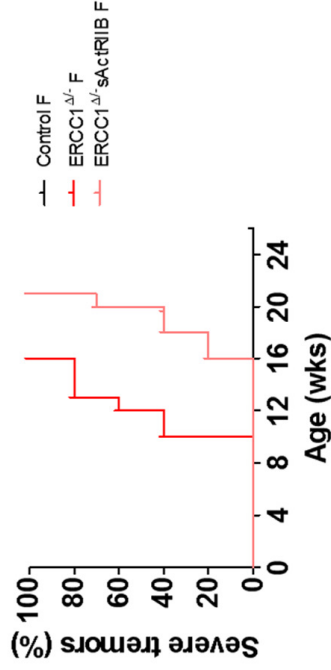

### D Survival males

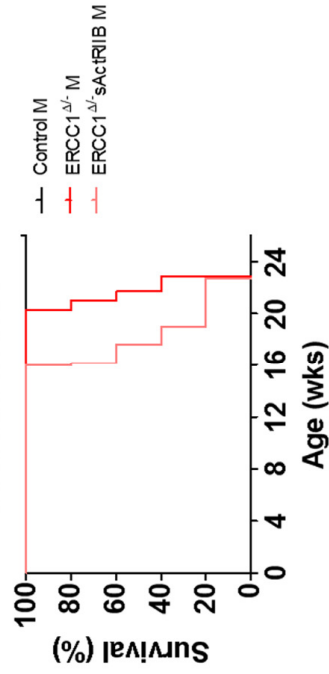

### Survival females

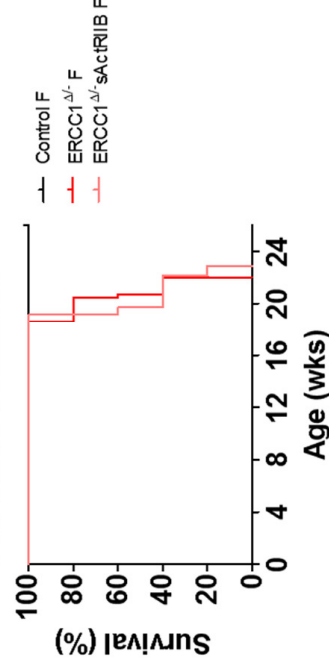

Supplement: JCSM-10-662-s006.pdf [file JCSM-10-662-s006.pdf]
